# Supplementary material
Source: PubMed Central journal article supplement (PMC4334704)
Supplement: NIHMS647490-supplement-1.pdf [file NIHMS647490-supplement-1.pdf]

Figure S1, related to Figure 1.

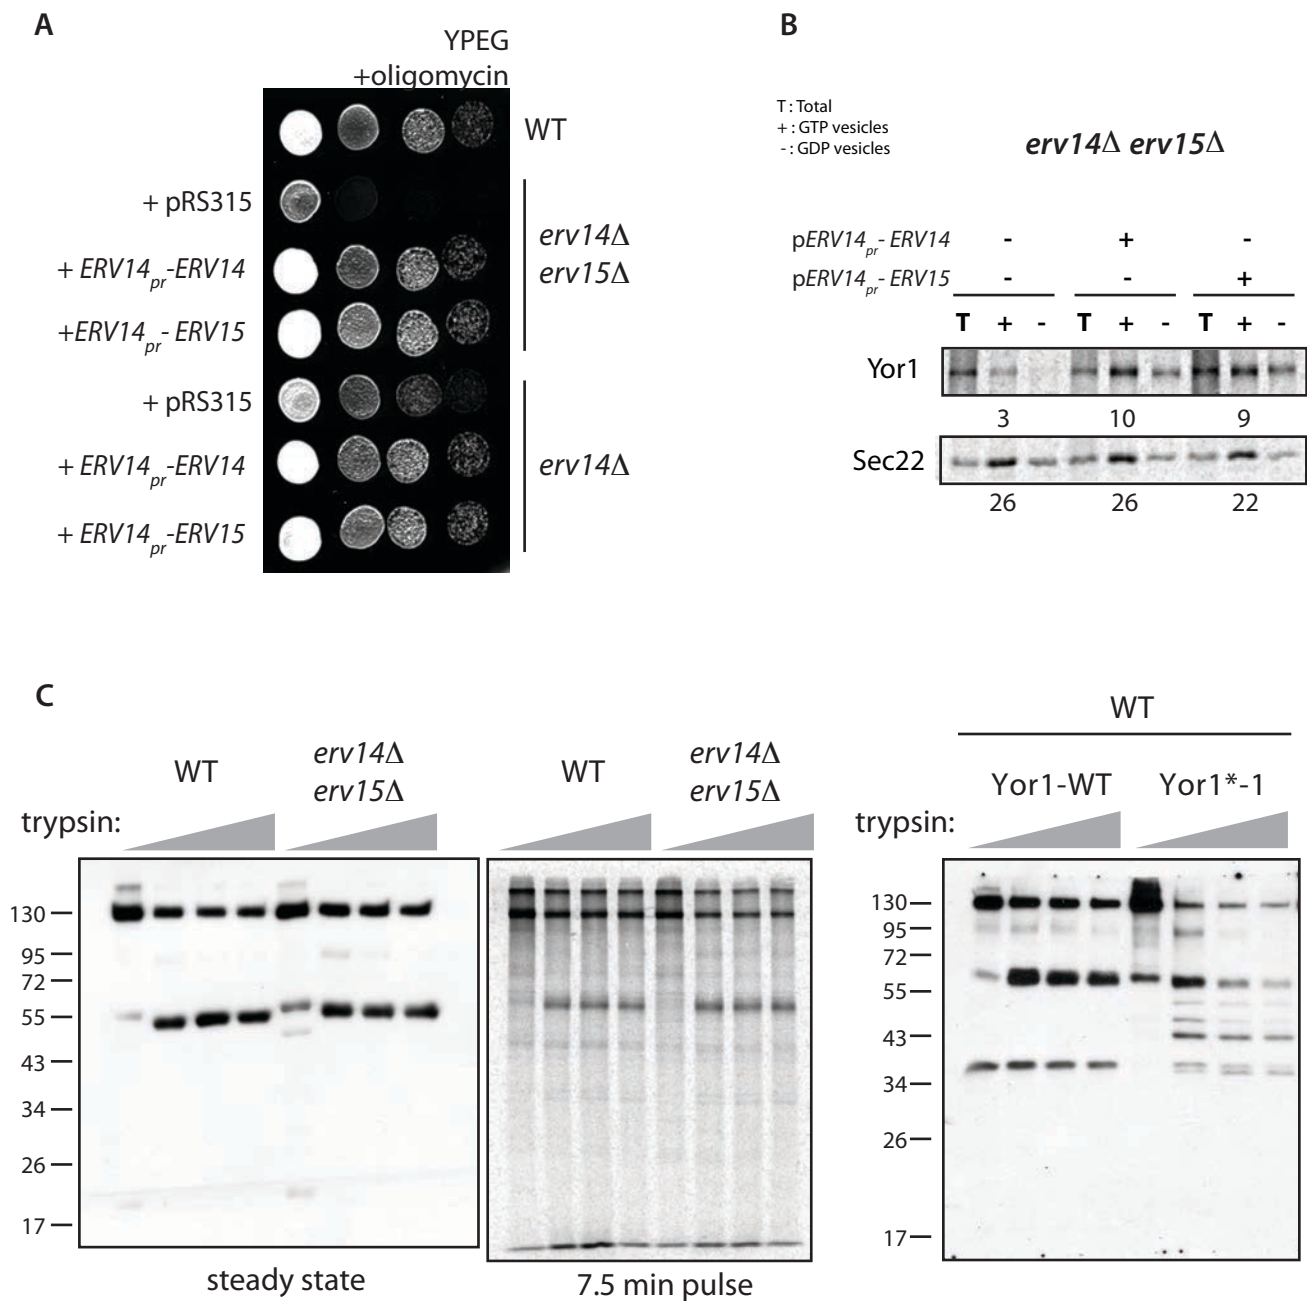

Figure S2, related to Figure 2 and Figure 6.

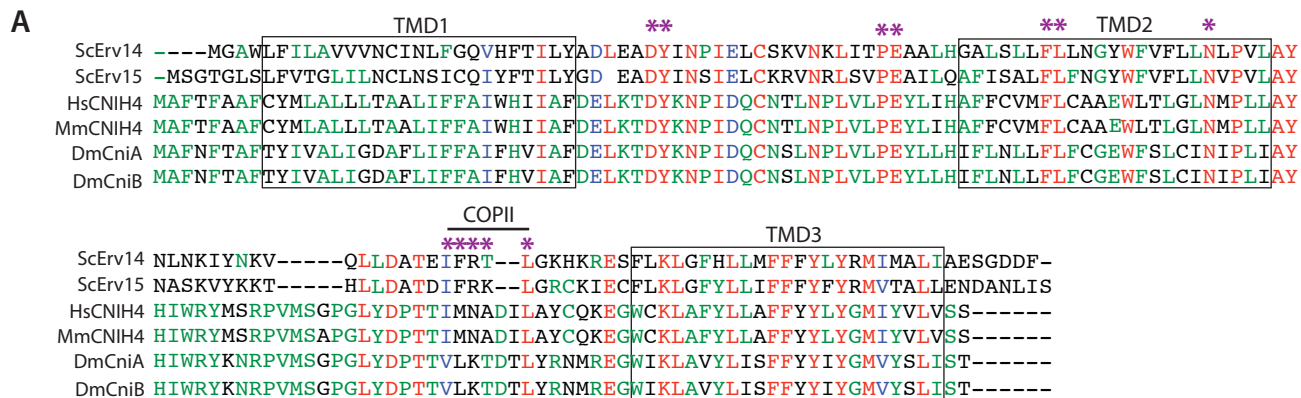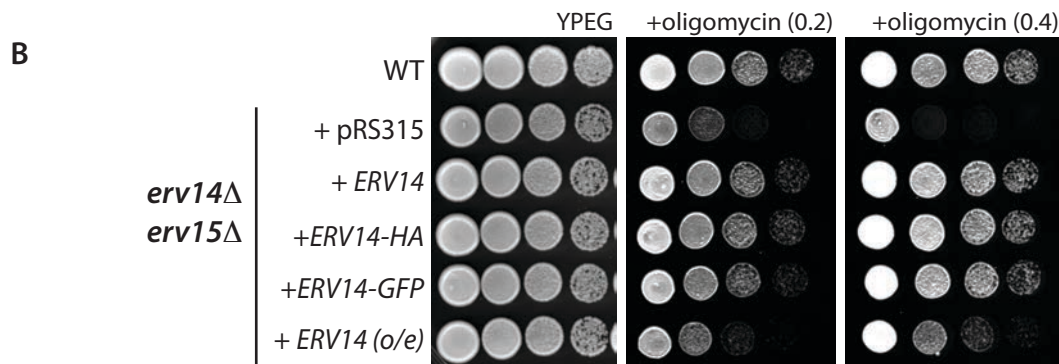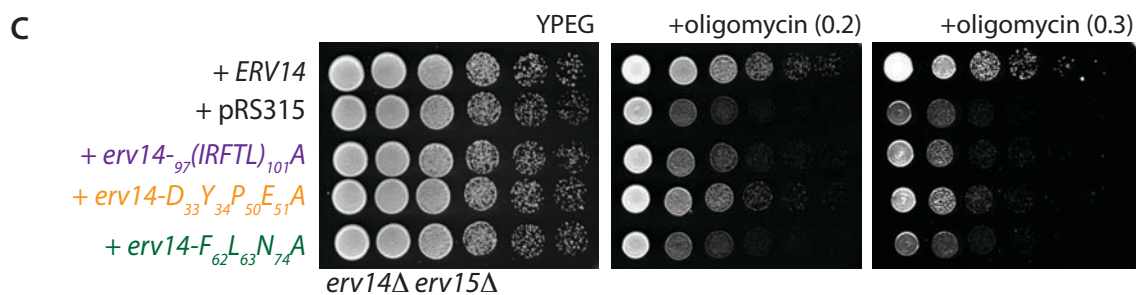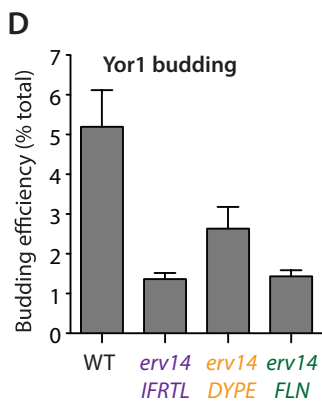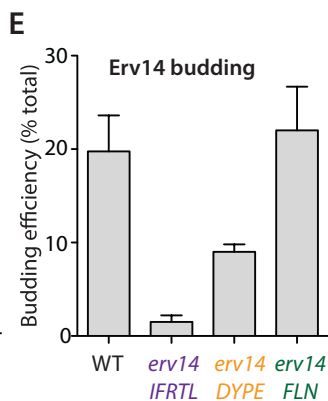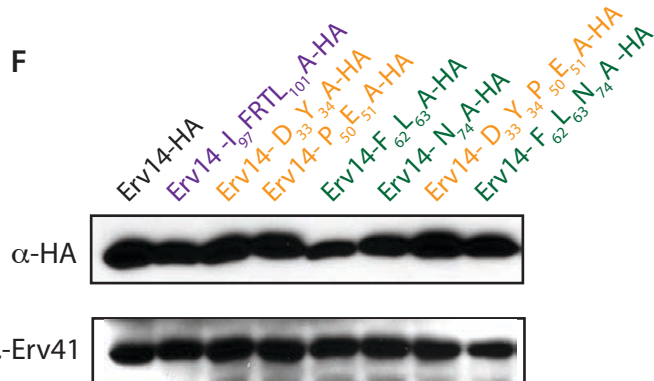

Figure S3, related to Figure 2.

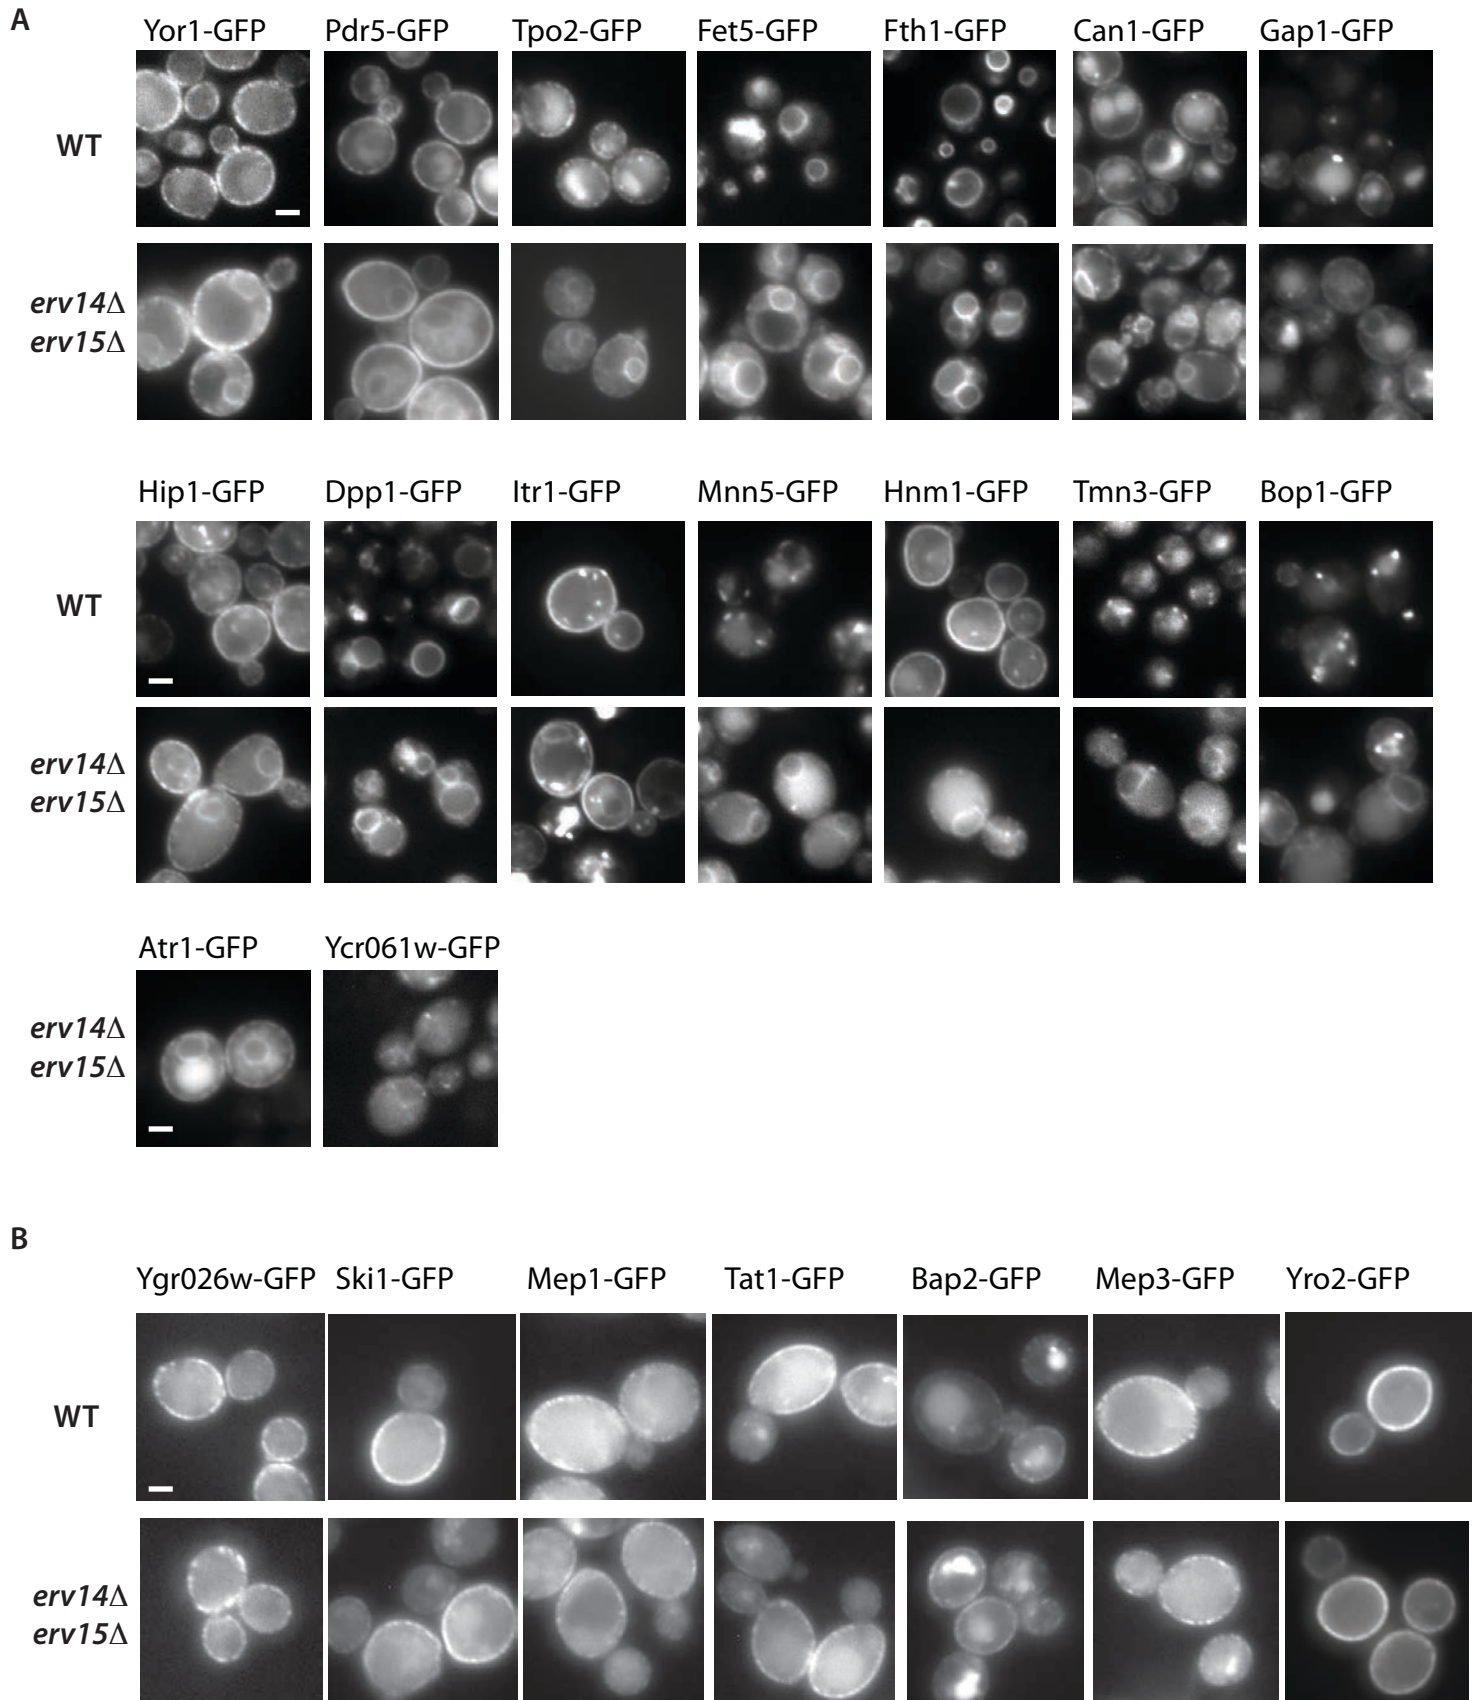

Figure S4, related to Figure 3.

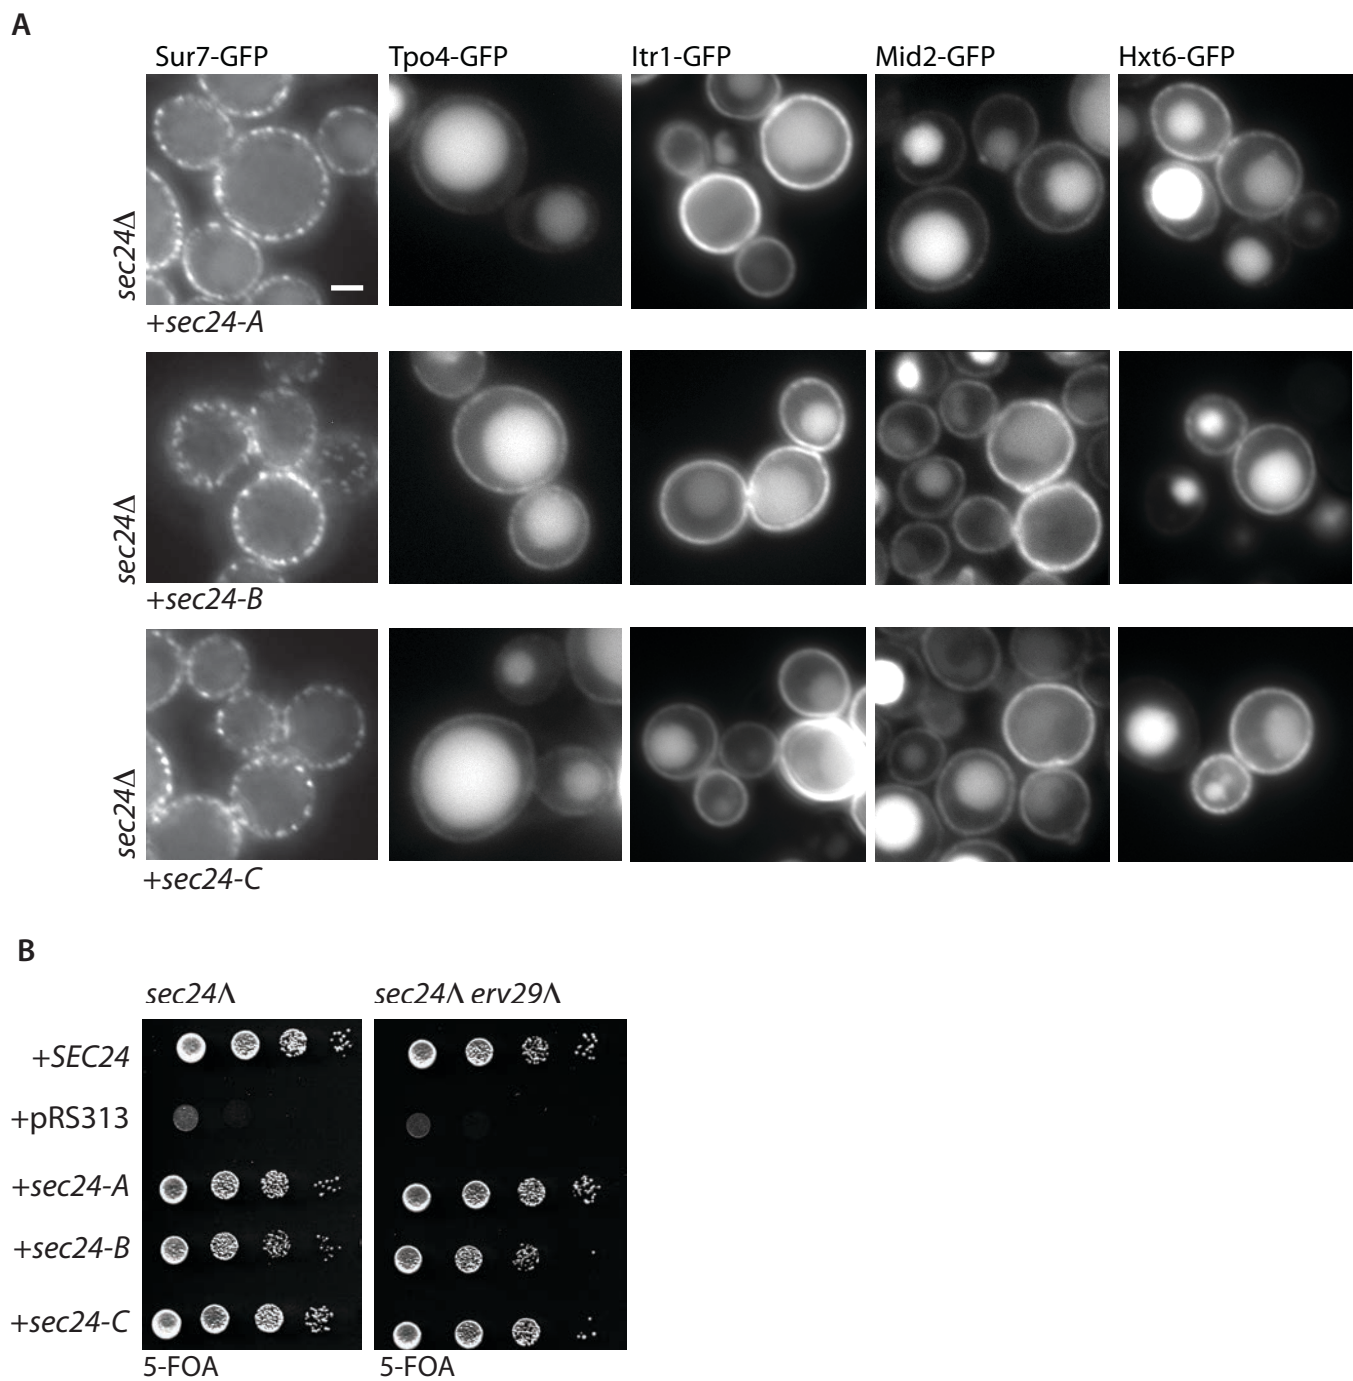

Figure S5, related to Figure 4.

A

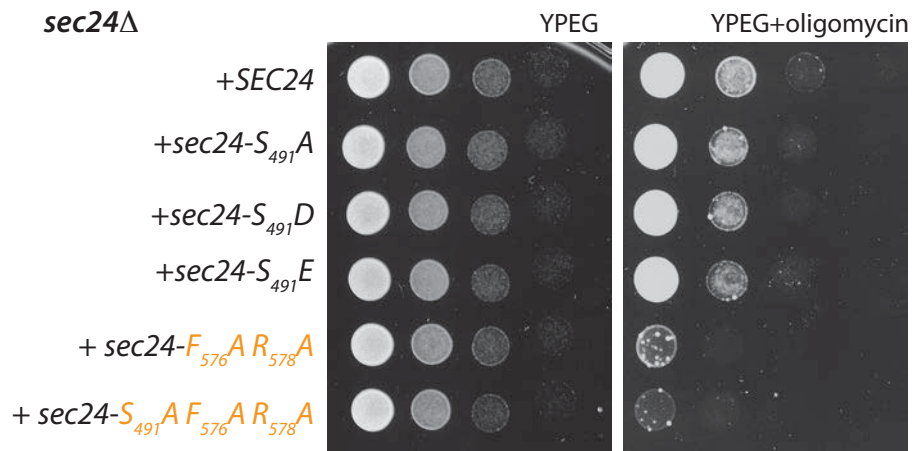

B

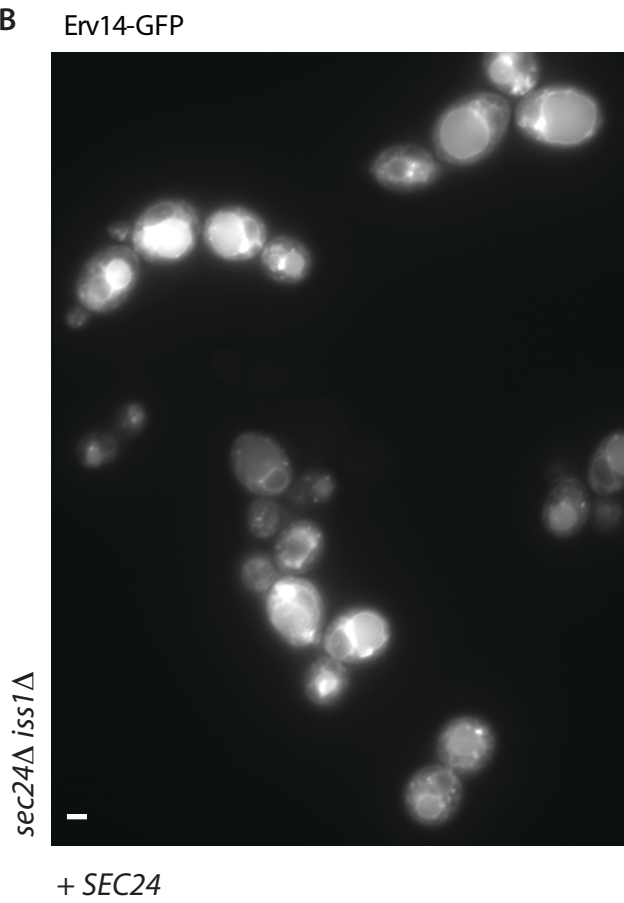

C

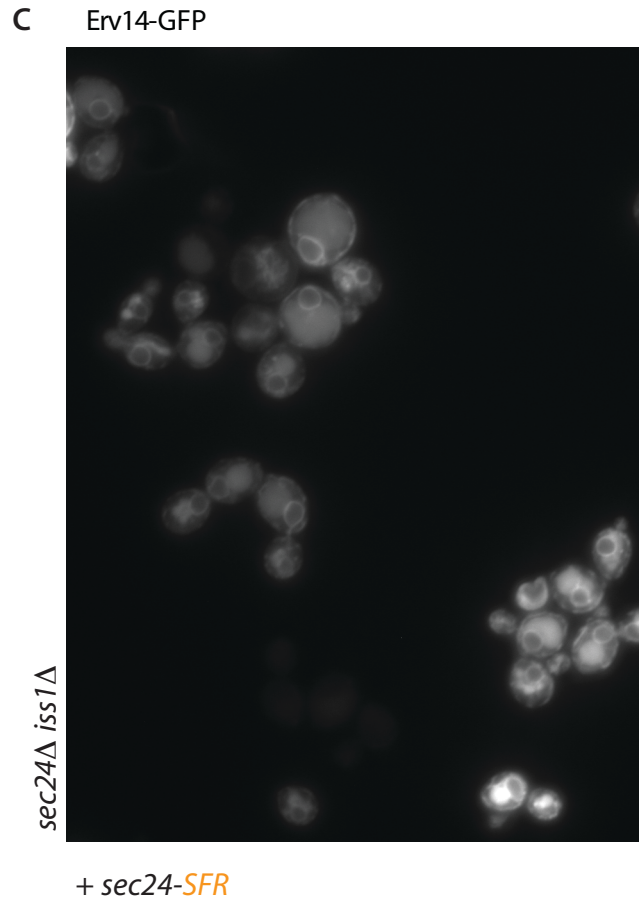

Figure S6, related to Figure 5.

**A** *sec24*Δ

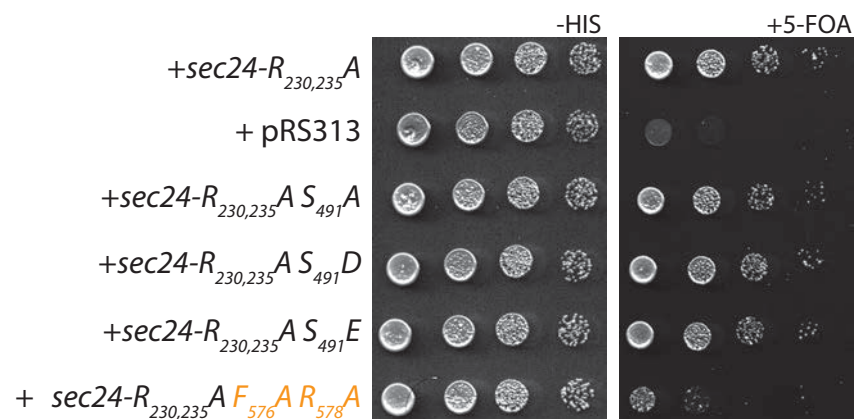

**B** *sec24*Δ + pRS313 *sec24-R*<sub>230,235</sub>*A*

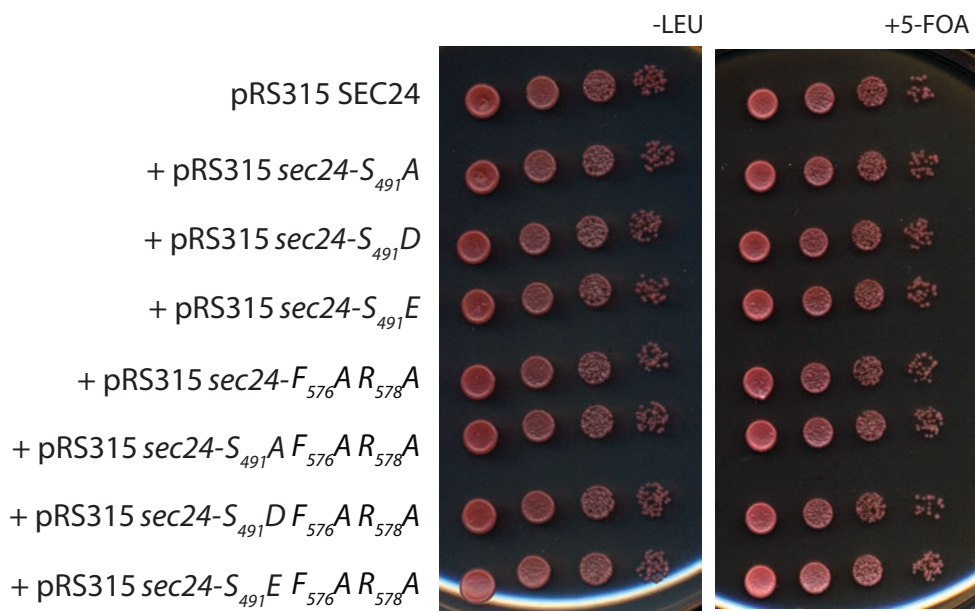

## Supplemental Figure Legends.

**Figure S1** (related to Figure 1). **Both Erv14 and Erv15 are necessary for Yor1 trafficking but do not contribute to Yor1 folding.** (A) The phenotype of *erv14Δ* or *erv14Δ erv15Δ* mutants expressing *ERV14* or *ERV15* under the control of the *ERV14* promoter was tested by serial dilutions onto YPEG + oligomycin (0.4 μg/ml). (B) Incorporation of Yor1 into COPII vesicles was measured from membranes isolated from *erv14Δ erv15Δ* cells that express either *ERV14* or *ERV15* under the control of the *ERV14* promoter as indicated. (C) Microsomal membranes (left panel) or radiolabelled semi intact cells (center panel) isolated from wild-type or *erv14Δ erv15Δ* cells expressing wild-type Yor1-HA were treated with increasing amounts of trypsin followed by SDS-PAGE and detection of HA-tagged proteolytic fragments. Misfolding of Yor1 results in the appearance of multiple lower molecular weight bands, as observed for a steady-state experiment using a misfolded allele of Yor1-HA (Yor1\*-HA; right panel).

**Figure S2** (related to Figure 2 and Figure 6). **Structure-function analysis of Erv14** (A) Multiple sequence alignment between Erv14 and Erv15 from *Saccharomyces cerevisiae* (Sc) and their Cornichon orthologs in human (Hs), mouse (Mm) and *Drosophila* (Dm), generated by Multalin ([http://npsapbil.ibcp.fr/cgi-bin/npsa\\_automat.pl?page=/NPSA/npsa\\_multalin.html](http://npsapbil.ibcp.fr/cgi-bin/npsa_automat.pl?page=/NPSA/npsa_multalin.html)). Conserved and similar residues are indicated in red and green, respectively. Boxes delimit the positions of three TMDs previously defined by Powers et al. (2002). The purple stars specify the residues analyzed in this study. (B) Ten-fold serial dilutions of *erv14Δ erv15Δ* cells expressing untagged, HA- or GFP-tagged versions of *ERV14* from a *CEN* plasmid or untagged *ERV14* from a 2μ plasmid (o/e) were tested for sensitivity to the indicated concentrations of oligomycin. Addition of HA and GFP epitopes at the C-terminus of Erv14 did not influence complementation of the oligomycin sensitivity displayed by the *erv14Δ erv15Δ* strain. Over-expression of *ERV14* accentuated drug sensitivity. (C) Cultures of *erv14Δ erv15Δ* cells bearing the plasmids indicated were

spotted onto media containing increasing concentrations of oligomycin (0, 0.2  $\mu\text{g/ml}$  and 0.3  $\mu\text{g/ml}$ ). Neither the cytosolic mutant (*erv14-IFTRL*) nor the TMD2 mutant (*erv14-FLN*) could complement oligomycin sensitivity. The luminal mutant (*erv14-DYPE*) showed an intermediate phenotype. (D) Incorporation of Yor1-HA into COPII vesicles was assayed as described in Fig1 from membranes isolated from the strains indicated. Quantification (right panel; n=3; error bars represent SD) showed that the capture of both Yor1-HA (D) and Erv14-HA (E) into the vesicle fraction was inhibited by mutation of the Erv14 *IFTRL* signal. Conversely, the abundance of Yor1-HA in COPII vesicles was perturbed in the context of *erv14-FLN* whereas packaging of *erv14-FLN-HA* itself was unaffected compared to wild-type *ERV14-HA*. Membranes expressing *erv14-DYPE* were partially affected both for Yor1 capture and Erv14 capture. (E) Anti-HA immunoblots of whole cell lysates expressing the indicated Erv14 variants.

**Figure S3** (related to Figure 2). **Erv14 traffics a subset of plasma membrane proteins.** (A and B) Wide-field fluorescent micrographs of the indicated cargo proteins tagged with GFP, expressed in wild-type or *erv14 $\Delta$  erv15 $\Delta$*  cells (Scale bar =2 $\mu\text{m}$ ). (A) Novel Erv14 clients identified in this study. (B) Plasma membrane proteins whose trafficking is independent of Erv14.

**Figure S4** (related to Figure 3). **Most Erv14 clients do not use known Sec24 binding sites.** (A) Localization of GFP-tagged versions of the indicated Erv14 clients were examined by epifluorescence microscopy in *sec24 $\Delta$*  strains expressing the cargo-binding site *sec24* mutants indicated. None of the Sec24 mutants impaired cell surface localization of Sur7-GFP, Tpo4-GFP, Itr1-GFP, Mid2-GFP and Hxt6-GFP (Scale bar =2 $\mu\text{m}$ ). (B) The indicated variants of *SEC24* were introduced into *sec24 $\Delta$*  or *sec24 $\Delta$  erv29 $\Delta$*  cells expressing wild-type *SEC24* from a *URA3*-marked plasmid and serial dilutions of the transformants were spotted onto medium containing 5-FOA, which counterselects for the *URA3*-marked plasmid. All *SEC24* mutants were viable in both *sec24 $\Delta$*  and *sec24 $\Delta$  erv29 $\Delta$*  strains.



**Figure S5** (related to Figure 4). **Characterization of the Erv14 binding site (Ser<sub>491</sub>, Phe<sub>576</sub>, Arg<sub>578</sub>) on Sec24.** (A) Strains expressing the indicated variants of *SEC24* as the sole copy were spotted on media containing oligomycin (0.4 µg/ml) to test for Yor1 function at the plasma membrane. (B and C) Erv14-GFP localization was monitored by epifluorescence microscopy in *sec24Δ iss1Δ* strains expressing (B) wild-type *SEC24* or (C) the *sec24-SFR* mutant (Scale bar =2µm).

**Figure S6** (related to Figure 5). **Phenotypic characterization of the Erv14 binding site (Ser<sub>491</sub>, Phe<sub>576</sub>, Arg<sub>578</sub>) on Sec24.** (A) A *sec24Δ* strain expressing wild-type *SEC24* from a *URA3*-marked plasmid was transformed with the indicated variants of *SEC24* and serial dilutions were spotted onto medium containing 5-FOA, which counterselects for the *URA3*-marked wild-type version. A variant of Sec24 bearing mutations that affect both the B-site (Arg<sub>230</sub> and Arg<sub>235</sub>) and the Erv14-binding site (Phe<sub>578</sub> and Arg<sub>578</sub>) was unable to sustain growth at 30°C. (B) A *sec24Δ* strain co-expressing wild-type *SEC24* on a *URA3*-marked plasmid and the B-site mutant *sec24-R230A R235A* on a *HIS3*-marked plasmid was transformed with the indicated variants of *SEC24* on a *LEU2*-marked plasmid and viability was tested after counterselection of the *URA3*-marked wild-type in presence of 5-FOA. No growth defect could be observed upon co-expression of Sec24 mutants independently affected for the B-site or for the Erv14-binding site.

**Table S2 (related to Figure 6) – Oligomycin phenotypes of *ERV14* mutants**

| Plasmid number | Mutation                   | Oligomycin Sensitivity |
|----------------|----------------------------|------------------------|
| LMB773         | WT                         | -                      |
| pRS315         | Empty plasmid              | +++                    |
| QC1889         | I97A F98A                  | ++                     |
| QC1890         | R99A T100A L101A           | -                      |
| QC1888         | I97A F98A R99A T100A L101A | +++                    |
| QC1891         | D33A Y34A                  | +                      |
| QC1892         | C41A                       | -                      |
| QC1893         | P50AE51A                   | -                      |
| QC1913         | D33A Y34A P50A E51A        | ++                     |
| QC1894         | F62A L63A                  | ++                     |
| QC1895         | W68A                       | -                      |
| QC1896         | N74A                       | ++                     |
| QC1908         | F62D L63A N74A             | +++                    |
| QC1897         | P76A                       | -                      |
| QC1898         | Y80A                       | -                      |
| QC1899         | E107A                      | -                      |
| QC1900         | K111A                      | -                      |
| QC1901         | F119A                      | -                      |
| QC1902         | F120A                      | -                      |
| QC1903         | Y124A                      | -                      |

An *erv14Δ erv15Δ* strain (SPY36) was transformed with the plasmids listed in the first column. Each transformant was spotted as 10-fold serial dilutions onto YPEG plates supplemented with oligomycin (0.2 µg/ml) to test for their sensitivity to the drug (third column). Sensitivity was scored relative to wild type and empty vector controls.

**Table S3 (related to Figure 6)– Mass spectrometry of Erv14-HA co-IPs**

| <b>Putative client</b> | <b>Erv14<sup>-97</sup>IFRTL<sub>101</sub>A<br/>emPAI score</b> | <b>Erv14<sup>-97</sup>IFRTL<sub>101</sub>A F<sub>62</sub>AL<sub>63</sub>A<br/>emPAI score</b> |
|------------------------|----------------------------------------------------------------|-----------------------------------------------------------------------------------------------|
| Bpt1†                  | 0.0666                                                         | 0.0147                                                                                        |
| Chs2†                  | 0.106                                                          | (0)                                                                                           |
| Cps1                   | 2.64                                                           | 0.833                                                                                         |
| Dnf1                   | 0.345                                                          | 0.158                                                                                         |
| Dnf2                   | 0.487                                                          | 0.292                                                                                         |
| Drs2                   | 0.204                                                          | (0)                                                                                           |
| Fks1†                  | 1.26                                                           | 0.808                                                                                         |
| Hoc1                   | 0.237                                                          | 0.126                                                                                         |
| Hxt2                   | 1.43                                                           | 2.04                                                                                          |
| Hxt3                   | 0.627                                                          | 0.782                                                                                         |
| Itr1                   | 0.0843                                                         | 0.0888                                                                                        |
| Ktr3†                  | 0.177                                                          | (0)                                                                                           |
| Lem3†                  | 0.302                                                          | 0.475                                                                                         |
| Mnn10†                 | 0.34                                                           | 0.227                                                                                         |
| Mnn11                  | 0.127                                                          | (0)                                                                                           |
| Mnn5                   | 0.111                                                          | (0)                                                                                           |
| Mnn5                   | 0.111                                                          | (0)                                                                                           |
| Mnn9†                  | 0.369                                                          | 0.0595                                                                                        |
| Mns1†                  | 0.335                                                          | 0.0854                                                                                        |
| Pdr5                   | 0.181                                                          | 0.223                                                                                         |
| Pho89†                 | 0.301                                                          | 0.103                                                                                         |
| Rsn1                   | 2.12                                                           | 1.89                                                                                          |
| Snq2                   | 0.338                                                          | 0.414                                                                                         |
| Sur7                   | 0.742                                                          | 0.395                                                                                         |
| Svp26†                 | 0.183                                                          | 0.208*                                                                                        |
| Tcb2                   | 0.155                                                          | 0.067                                                                                         |
| Tcb3†                  | 0.165                                                          | (0)                                                                                           |
| Tna1                   | 0.608                                                          | 0.581                                                                                         |
| Vph1†                  | 0.0992                                                         | 0.14                                                                                          |
| Yor1                   | 0.0747                                                         | 0.0622*                                                                                       |

† Candidate clients identified by mass spectrometry only

\* emPAI scores were equivalent between “wt” and “TM2” Erv14 variants, but spectral counts were lower for the TM2 co-IPs, suggesting a decreased recovery in the TM2 IPs.

## Supplemental Experimental Procedures

### ***Yeast Strains and Strain Construction.***

*S. cerevisiae* strains used in this study are listed below with a complete list of primers used for strain construction. Unless otherwise stated, strains harboring a deletion in a specific ORF were taken from the yeast deletion library [S1]. Strains harboring an ORF endogenously tagged with GFP at the C-terminus were taken from the yeast GFP library [S2]. *ERV14* and/or *ERV15* were deleted in various strain backgrounds (SPY34, SPY36, SPY81, and SPY82) by transformation with a polymerase chain reaction (PCR) product composed of the *erv14Δ::NatMX* or *erv15Δ::KanMX* disruption cassettes, generated by PCR amplification from the pAG25 plasmid or pFA6a-KanMX6 respectively [S3]. All allelic replacements were confirmed by PCR. SPY80 (*Mata can1Δ::STE2pr-URA3*) was created as a query strain compatible with secretome techniques [S4] with the yeast GFP library, which is marked with the *HIS3* marker. The coding sequence of the *URA3* gene was introduced downstream of the *STE2* promoter by transformation in BY4741 [Mata] of the PCR product generated with the primers olm4779 and 4780. The *STE2pr-URA3* cassette was then re-amplified by PCR with the primers olm4779 and olm4780 and was integrated by transformation at the *CAN1* locus of the BY4742 strain [Mata]. Genomic DNA of transformants showing resistance to canavanine was tested for the correct insertion of *can1Δ::STE2pr-URA3* by sequencing the PCR product generated with the primers olm4783 and olm4796. For confirmation of *Erv14* independence, GFP fusions, marked by *HIS5*, were integrated at the 3' end of various *Erv14* non-clients by transformation of SPY37 (*erv14Δ::KanMX erv15::NatMX*) with a PCR product generated by amplification from a GFP(S65T)-*HIS5* plasmid. All GFP integrations were confirmed by genomic PCR. The split ubiquitin analysis was conducted in the THY AP4 strain background [S5]. The CYT (Cub-(YFP)LexA-VP16) tag, marked by the KanMX marker, was integrated at the 3' end of various *Erv14* clients by transformation with a PCR product generated by amplification from the pCYT-L3 plasmid. All CYT insertions were confirmed by PCR of the genomic locus. For analysis of Sec24-dependence, GFP fusions, marked by

*TRP1*, were integrated at the 3' end of various *Erv14* clients by transformation of YTB1 (*sec24Δ::LEU2* with wild-type *SEC24* borne on a *URA*-containing plasmid) with a PCR product generated by amplification from a GFP(S65T)-*TRP* plasmid. All GFP integrations were confirmed by genomic PCR and cell imaging. Strains bearing mutant forms of *SEC24* as the sole copy of this essential gene were created by transforming YTB1 or its GFP-containing client derivatives with either wild-type or mutant forms of *SEC24* on *HIS*-marked plasmids. Cells were cured of the wild-type *SEC24::URA* plasmid by growth on 5-fluoroorotic acid (0.1% final concentration), leaving the plasmid-borne copy as the sole copy of *SEC24*.

### Strains used in this study

| Strain   | Genotype                                                                                                           | Source          |
|----------|--------------------------------------------------------------------------------------------------------------------|-----------------|
| BY4741   | <i>MATa his3Δ1 leu2Δ0 lys2Δ0 ura3Δ0</i>                                                                            | Open Biosystems |
| BY4742   | <i>MATα his3Δ1 leu2Δ0 lys2Δ0 ura3Δ0</i>                                                                            | Open Biosystems |
| LMY829   | <i>MATα his3Δ1 leu2Δ0 met15Δ0 ura3Δ0 can1Δ::STE2pr-spHIS5</i>                                                      | [S6]            |
| LMY1017  | <i>erv14Δ::KanMX</i> in BY4741                                                                                     | Open Biosystems |
| SPY34    | <i>erv14Δ::NatMX</i> in LMY829                                                                                     | This study      |
| SPY35    | <i>erv15Δ::KanMX</i> in BY4741                                                                                     | Open Biosystems |
| SPY36    | <i>erv14Δ::NatMX erv15Δ::KanMX</i> in LMY829                                                                       | This Study      |
| SPY37    | <i>erv14Δ::KanMX erv15Δ::NatMX</i> in BY4741                                                                       | This Study      |
| SPY80    | <i>MATα his3Δ1 leu2Δ0 lys2Δ0 ura3Δ0 can1Δ::STE2pr-URA3</i>                                                         | This Study      |
| SPY81    | SPY80 <i>erv14Δ::NatMX</i>                                                                                         | This Study      |
| SPY82    | SPY80 <i>erv14Δ::NatMX erv15Δ::KanMX</i>                                                                           | This Study      |
| THY AP4  | <i>MATa ura3 leu2 lexA::lacZ::trp1 lexA::HIS3 lexA::ADE2</i>                                                       | [S5]            |
| YOR1-CYT | THY AP4 <i>YOR1-CYT::KanMX</i>                                                                                     | [S7]            |
| SUR7-CYT | THY AP4 <i>SUR7-CYT::KanMX</i>                                                                                     | This Study      |
| QDR2-CYT | THY AP4 <i>QDR2-CYT::KanMX</i>                                                                                     | This Study      |
| LYP1-CYT | THY AP4 <i>LYP1-CYT::KanMX</i>                                                                                     | This Study      |
| ITR1-CYT | THY AP4 <i>ITR1-CYT::KanMX</i>                                                                                     | This Study      |
| HXT3-CYT | THY AP4 <i>HXT3-CYT::KanMX</i>                                                                                     | This Study      |
| YTB1     | <i>MATα can1-100 leu2-2,112 his3-11,15 trp1-1 ura3-1 ade2 sec24::LEU2</i> carrying pLM22 ( <i>CEN SEC24-URA3</i> ) | [S8]            |
| SPY100   | YTB1 <i>MID2-sfGFP::TRP1</i>                                                                                       | This Study      |
| SPY101   | YTB1 <i>DPP1-sfGFP::TRP1</i>                                                                                       | This Study      |
| SPY102   | YTB1 <i>HIP1-sfGFP::TRP1</i>                                                                                       | This Study      |
| SPY103   | YTB1 <i>MEP2-sfGFP::TRP1</i>                                                                                       | This Study      |
| SPY104   | YTB1 <i>HXT6-sfGFP::TRP1</i>                                                                                       | This Study      |
| SPY105   | YTB1 <i>ITR1-sfGFP::TRP1</i>                                                                                       | This Study      |
| SPY106   | YTB1 <i>TPO4-sfGFP::TRP1</i>                                                                                       | This Study      |

|        |                                                                                      |              |
|--------|--------------------------------------------------------------------------------------|--------------|
| SPY107 | YTB1 MNN5-sfGFP:: <i>TRP1</i>                                                        | This Study   |
| SPY108 | YTB1 DRS2-sfGFP:: <i>TRP1</i>                                                        | This Study   |
| SPY109 | YTB1 SUR7-sfGFP:: <i>TRP1</i>                                                        | This Study   |
| SPY110 | YTB1 PDR5-sfGFP:: <i>TRP1</i>                                                        | This Study   |
| SPY111 | YTB1 FTH1-sfGFP:: <i>TRP1</i>                                                        | This Study   |
| SPY112 | SPY37 TAT1-sfGFP:: <i>HIS5</i>                                                       | This Study   |
| SPY113 | SPY37 BAP2-sfGFP:: <i>HIS5</i>                                                       | This Study   |
| SPY114 | SPY37 MEP1-sfGFP:: <i>HIS5</i>                                                       | This Study   |
| SPY115 | SPY37 MEP3-sfGFP:: <i>HIS5</i>                                                       | This Study   |
| SPY116 | SPY37 YR02-sfGFP:: <i>HIS5</i>                                                       | This Study   |
| SPY117 | SPY37 SKI1-sfGFP:: <i>HIS5</i>                                                       | This Study   |
| SPY118 | SPY37 Ygr026w-sfGFP:: <i>HIS5</i>                                                    | This Study   |
| RSY620 | <i>MAT<math>\alpha</math> leu2-3,112 ura3-52 ade2-1 trp1-1 his3-11,15 pep4::TRP1</i> | Schekman lab |

### PCR Primers used in this study

| Primer Name | Sequence                                                                                         | Purpose                                      | Template                       |
|-------------|--------------------------------------------------------------------------------------------------|----------------------------------------------|--------------------------------|
| olm2257     | CTTTGAACTGCAATTAAGTAAAGTAAAAAATTAAGAATAAAAAGA<br>AAACAGCTGAAGCTTCGTACGC                          | <i>ERV14::NatM</i>                           | pAG25                          |
| olm2258     | CTATTATCTTGGCCCTTCAGTCTTCTTTGGATTCAATGTCTTGTGGA<br>GCATAGGCCACTAGTGGATCTG                        | X deletion                                   |                                |
| olm4441     | AGACATTAATACCTTTATTCATATAAGCACTTTCATTATCATTITTTACT<br>AAAGATAAAAATAACTGCAGCAGCTGAAGCTTCGTACGC    | <i>ERV15::KanM</i>                           | pFA6a-<br>KanMX6               |
| olm4442     | ACTTCCATACTAAGGAAGTTGTGTTATAAGGTCATTTTTATGTGGTAG<br>ACATACTTCATAGATATGCACAGCATAGGCCACTAGTGGATCTG | X deletion                                   |                                |
| olm4196     | CTATAGGGCGAATTGGAGCTCCACCGCGGTGGCGGCCGCTCTAGAAC<br>TAGTGGAAATTTGAGATAATTGTTGG                    | Cloning (gap<br>repair) of                   | Genome                         |
| olm4197     | CTCGAGGTCGACGGTATCGATAAGCTTGATATCGAATTCCTGCAGCCC<br>GGGTTTCATTTAGATTCAGATTTGG                    | <i>ERV14</i> into<br>pRS31X                  |                                |
| olm4445     | TACTTAACAAAGACATTTACCTTTGAACTGCAATTAAGTAAAGTAAA<br>AAAATTAAGAATAAAAAGAAAAATGTCAGGAACCGGATTATCG   | Replacing<br>(gap repair)                    | Genome                         |
| olm4446     | GGGCGGCCATTAAGTATGTCTATTATCTTGGCCCTTCAGTCTTCTTG<br>GATTTCAATGTCTTGTGGATTAGCTTATCAAATTTGCATC      | <i>ERV14</i> ORF<br>with <i>ERV15</i><br>ORF |                                |
| olm4097     | AATACGAAGGAGAGACCTGG                                                                             | Checking                                     |                                |
| olm4098     | TTATTCTTGGCCCTTCAGTC                                                                             | <i>ERV14</i> locus                           | Genome                         |
| olm4447     | GTAGACATACTTCATAGATATGC                                                                          | Checking                                     |                                |
| olm4448     | GACATTAATACCTTTATTCATATAAGC                                                                      | <i>ERV15</i> locus                           | Genome                         |
| olm4047     | CAGAATGATCATGGCTTTGATTGCTGAAAGTGGTGATGACTTCCGGA<br>TCCCCGGGTAAATTA                               | C-term<br>tagging                            | pFA6a-GFP<br>or pFA6a-<br>3xHA |
| olm4048     | GGCCCTTCAGTCTTCTTTGGATTTCAATGTCTTGTGGAGTTTAAACGA<br>GCTCG AATTC                                  | of <i>ERV14</i>                              |                                |
| oLM2539     | AGATTACGCTGGATCCAAGCAGTGGTATCAACGCAGAGTGGCCATTA<br>CGGATGGGTGCTTGGTTATTTATC                      | Cloning (gap<br>repair) of                   | Genome                         |
| oLM2540     | CGACGGTATCGATAAGCTTGATATCGAATTCGAGAGGCCGAGGCG<br>GCCTTAGAAGTCATCACCACCTT                         | <i>ERV14</i> into<br>pDSL-Nx                 |                                |
| olm4779     | CCTGCTCTGGCTATAATTATAATTGGTTACTTAAAAATGCACCGTTAA<br>GAACCATATCCAAGAATCAAAAATGTCGAAAGCTACATATAAGG | Insertion of<br><i>URA3</i> ORF              | pRS306                         |

| Primer Name | Sequence                                                                                                 | Purpose                                                           | Template  |
|-------------|----------------------------------------------------------------------------------------------------------|-------------------------------------------------------------------|-----------|
| olm4780     | AGCACTGAATCTAGTAGTAACCTTATACCGAAGGTCACGAAATTACT<br>TTTTCAAAGCCGTAAATTTTGATTAGTTTTGCTGGCCGCATC            | downstream of <i>STE2</i> promotor.                               |           |
| olm4781     | ATCCAATATCACCTGACCTTC                                                                                    | Checking                                                          | Genome    |
| olm4783     | TTAGTTTTGCTGGCCGCATC                                                                                     | insertion of <i>STE2pr-URA3</i>                                   |           |
| olm4793     | CGAAAGTTTATTTTCAGAGTTCTTCAGACTTCTTAACTCCTGTAAAAACA<br>AAAAAAAAAAAAAGGCATAGCAATCCAATATCACCTGACCTTC        | Insertion of <i>STE2pr-URA3</i> cassette at the <i>CAN1</i> locus | Genome    |
| olm4795     | GTGTATGACTTATGAGGGTGAGAATGCGAAATGGCGTGGAATGTG<br>ATCAAAGGTAATAAACGTCATATTTAGTTTTGCTGGCCGCATC             |                                                                   |           |
| olm4796     | CTTCAGACTTCTTAACTCCTG                                                                                    | Checking                                                          | Genome    |
| olm4783     | TTAGTTTTGCTGGCCGCATC                                                                                     | insertion of <i>STE2pr-URA3</i> at the <i>CAN1</i> locus          |           |
| olm4948     | CTCTATTTATTCTCTTGAGAAAAGGTAAAGAATTAGCCTTTAAGAGG<br>AAAAAGCAAGAACTGGGAGTAAATATGTCGGGGGGGATCCCTCC          | CYT tagging <i>QDR2</i> C-terminus                                | pCYT-L3   |
| olm4949     | ATTACTTTCTATTTGAGAAGACTTATCACACCAATTCCTTTTCTCGGT<br>AGTGGAGCGATCAAAGGAACATTTTCTTACTATAGGGAGACCGGC<br>AG  |                                                                   |           |
| olm4956     | CAACCTAAAGGTATTAACCTTCTCACTATAAGAAAATCACACGAGCGC<br>CCGGACGATGCTCTGTATGTCGGGGGGGATCCCTCC                 | CYT tagging <i>SUR7</i> C-terminus                                | pCYT-L3   |
| olm4957     | AAATATAGGATATTATTAATATTAGAATTAACCTATTATATTGCAGGG<br>GAGAGAAGAAAGGGGTATAAATATAGGGAGACCGGCAG               |                                                                   |           |
| olm5006     | GGTGCTAACTACGATGCTGATGCATTGATGCATGATGACCAGCCATTC<br>TACAAGAAAATGTTCCGCAAGAAAATGTCGGGGGGGATCCCTCC         | CYT tagging <i>HXT3</i> C-terminus                                | pCYT-L3   |
| olm5007     | ATATAAAGTCATAAATCTTGTGTATTATTTATCATTATTGACTAGCACA<br>TCGAATCTTAAAAACACTATTAATATAGGGAGACCGGCAG            |                                                                   |           |
| olm5012     | AAGAGAAAACAGCAAGTTGCCAGAGTTCATGAATTGAAATATGAACC<br>AACTCAAGAGATTATAGAGGATATA ATGTCGGGGGGGATCCCTCC        | CYT tagging <i>ITR1</i> C-terminus                                | pCYT-L3   |
| olm5013     | TACAATGAACCTTTTTCTATCTTGTAAATTTATTTTATTTTCTACTA<br>TGATTTGAATATTCAATTGCGT ACTATAGGGAGACCGGCAG            |                                                                   |           |
| olm5014     | GAAGAAATGAGGATTGAGCGAGAAACATTAGCAAAAAGATCCTTCGT<br>AACAAAGATTTTACATTTCTGGTGTATGTCGGGGGGGATCCCTCC         | CYT tagging <i>HIP1</i> C-terminus                                | pCYT-L3   |
| olm5015     | CAGTAATATACACAGATTCGCGGACGTGGGAAGGAAAAAATTAGA<br>TAACAAAATCTGAGTGATATGGAAATTCGACTATAGGGAGACCGGC<br>AG    |                                                                   |           |
| olm4926     | GATGCAATGTGTGAGTATTTGACCAATCATGTTAATTATCTGGAGAGC<br>ACACACAAAGAAGCTATGGGGGAGAAAACCGGATCCCCGGGTAA<br>TTAA | GFP tagging <i>MNN5</i> C-terminus                                | pFA6a-GFP |
| olm4927     | TTTTCTAAGATGTATATATCCGTGCACATATATGCTACATTATATTA<br>TACAAGGTCGGATGGCGAGTTATTATTGAATTCGAGCTCGTTTAAAC       |                                                                   |           |
| olm4936     | GATGCAATGTGTGAGTATTTGACCAATCATGTTAATTATCTGGAGAGC<br>ACACACAAAGAAGCTATGGGGGAGAAAACCGGATCCCCGGGTAAAT<br>AA | GFP tagging <i>DRS2</i> C-terminus                                | pFA6a-GFP |
| olm4937     | TATGGTAAATGTACATATTTAGTAATGGTAATAATGACTTTTCTTTTT<br>ATCTTATTTTTATTTTTGTATTTGAATTCGAGCTCGTTTAAAC          |                                                                   |           |
| olm4938     | CAACCTAAAGGTATTAACCTTCTCACTATAAGAAAATCACACGAGCGC<br>CCGGACGATGTC TCTGTTCCGATCCCCGGGTAAATTA               | GFP tagging <i>SUR7</i> C-                                        | pFA6a-GFP |

| Primer Name | Sequence                                                                                              | Purpose                                   | Template  |
|-------------|-------------------------------------------------------------------------------------------------------|-------------------------------------------|-----------|
| olm4939     | AAATATAGGATATTATTAATATTAGAATTAACACTATTATATTGCAGGG<br>GAGAGAAGAAAGGGGTATAAGAATTCGAGCTCGTTTAAAC         | terminus                                  |           |
| olm4940     | CACCTGGAGGAAGCAGTCACCCATCAGAGGATCCCGGATGAGGAA<br>TTACATCCTTTGTCCGATGAAGGTATGCGGATCCCCGGGTTAATTAA      | GFP tagging<br><i>DPP1</i> C-             | pFA6a-GFP |
| olm4941     | AGAAGTAACATGTCATCTTTATGTAATCGCTGTTATTCCATACAGAAC<br>AATAAATACGTATATTGAATTCGAGCTCGTTTAAAC              | terminus                                  |           |
| MID2-GFPf   | TTGCGTCAAATGACATAATAGAAGAAAAATTCTATGATGAACAAGGT<br>AACGAATTATCACCACGAAATTATCGGATCCCCGGGTTAATTAA       | GFP tagging<br><i>MID2</i> C-             | pFA6a-GFP |
| MID2-GFPPr  | TCCACCTACTCAATATCAGAAATATAATTAAGATGGTCAATTTACAATA<br>ATTGAGGAATGAAAAGTAGCCGAATTCGAGCTCGTTTAAAC        | terminus                                  |           |
| ITR1-GFPf   | AAGAGAAAACAGCAAGTTGCCAGAGTTCATGAATTGAAATATGAACC<br>AACTCAAGAGATTATAGAGGATATA CGGATCCCCGGGTTAATTAA     | GFP tagging                               | pFA6a-GFP |
| ITR1-GFPPr  | TACAATGAACTTTTTTCTATCTTGTAAATTTATTTTTATTTTCTACTA<br>TGATTTGAATATTCAATTGCGTGAATTCGAGCTCGTTTAAAC        | <i>ITR1</i> C-<br>terminus                |           |
| HIP1-GFPf   | GAAGAAATGAGGATTGAGCGAGAAACATTAGCAAAAAGATCCTTCGT<br>AACAAAGATTTTTACATTTCTGGTGT CGGATCCCCGGGTTAATTAA    | GFP tagging<br><i>HIP1</i> C-             | pFA6a-GFP |
| HIP1-GFPPr  | CAGTAATATACACAGATTCCC CGGACGTGGGAAGGAAAAAATTAGA<br>TAACAAAATCTGAGTGATGGAATTCGGAATTCGAGCTCGTTTAA<br>AC | terminus                                  |           |
| FTH1-GFPf   | TCAGAGCCAGACAGTCAAAGACGGTCAAAGATAGTTCTGTGCCCT<br>AATAATTGATAGCAGTGGTTCAGCAAAT<br>CGGATCCCCGGGTTAATTAA | GFP tagging<br><i>FTH1</i> C-<br>terminus | pFA6a-GFP |
| FTH1-GFPPr  | GCTATTTTTAATGACGAATATATATGTACATAGTATTTACTGTAAAATG<br>TATGAAAAGAAGCTTAAAATTATTAGAATTCGAGCTCGTTTAAAC    |                                           |           |
| PDR5-GFPf   | ATTATATCGCTGGTGTCTTTTTCTACTGGTTAGCAAGAGTGCCTAAAA<br>AGAACGGTAAACTCTCCAAGAAACGGATCCCCGGGTTAATTAA       | GFP tagging<br><i>PDR5</i> C-             | pFA6a-GFP |
| PDR5-GFPPr  | TGAAATGTAGAAAGCTCGCTGAATTAAGAAAAAAAAAATAAAAACTT<br>ATTATTACGCACCTATATGTAGTGAATTCGAGCTCGTTTAAAC        | terminus                                  |           |
| TPO4-GFPf   | CAGCTATCAAGGATAATGAAGACGGTTATTCTGATACGGAAATGGCC<br>ACCGATGCTTCCGCCAGAATGGTTCGGATCCCCGGGTTAATTAA       | GFP tagging<br><i>TPO4</i> C-             | pFA6a-GFP |
| TPO4-GFPPr  | TTGTATGAAACTTCTATAAATTTAAATTGGTGAATTTATCCAGCTATC<br>CCCCAATTTACTATTTGAATATATGAATTCGAGCTCGTTTAAAC      | terminus                                  |           |
| HXT6-GFPf   | GAGGTGCCAACTACGACGCTGAAGAAATGGCTCACGATGATAAGCCA<br>TTGTACAAGAGAATGTT CAGCACCAAACGGATCCCCGGGTTAATTAA   | GFP tagging<br><i>HXT6</i> C-             | pFA6a-GFP |
| HXT6-GFPPr  | TAAATCGTAAGGGTTCATTAATAAATAAAAATCAGAATTAGAGTGCCAT<br>TTCAAATGCACAAATTAGAGCGGAATTCGAGCTCGTTTAAAC       | terminus                                  |           |
| MEP2-GFPf   | GAAAAGAATTCTACGCCTTCCGACGCTTCTACTAAGAACA CTGAC<br>CATATAGTACGGATCCCCGGGTTAATTAA                       | GFP tagging<br><i>MEP2</i> C-             | pFA6a-GFP |
| MEP2-GFPPr  | TATCAAAAAAAGAAAATATATCAAATATTA AAAATAAAATTATTAAT<br>GAAGCGTTACATAAAGATTA AACATAAGAATTCGAGCTCGTTTAAAC  | terminus                                  |           |

### **Plasmid construction.**

Plasmids used in this study are listed bellow. LMB769 and LMB770 were generated by in-vivo gap repair of a PCR-generated product that comprises the promoter, the ORF and the 3' UTR of *ERV14* into the gapped plasmid pRS315 or pRS316 respectively.



Transformants were first selected on –LEU or –URA media respectively. Plasmids were recovered and sequenced. LMB772 and LMB773 were created as follows: the 3HA-KanMX or GFP(S65T)-KanMX sequences were amplified from the corresponding pFA6a plasmids and co-transformed into yeast with the wild-type *ERV14* plasmid, LMB769. Transformants were first selected on media supplemented with G418, then expression of *Erv14*-GFP or *Erv14*-3HA was tested by Western blotting. Plasmids were recovered and sequenced to confirm the integration. A PCR-generated product corresponding to the ORF of *ERV14* was introduced by in-vivo gap repair into the linearized plasmid pDSL-Nx to create the *NUB-ERV14* plasmid (LMB718) used as bait for the split ubiquitin analysis. These plasmids were the basis for site-directed mutagenesis by using QuikChange mutagenesis (Stratagene) to obtain various HA-, GFP- or NUB-tagged *Erv14* mutants. The plasmid pJW1512-*SEC24* [S9] was the basis for site-directed mutagenesis by using QuikChange mutagenesis (Stratagene) to create the various A-, B- and C-site mutants of *SEC24* under the control of the CUP1 promoter. LMB856 and LMB857 were generated by in-vivo gap repair of a PCR-generated product that comprises the promoter, ORF and 3' UTR of *MEP1* or *MEP3* respectively into the gapped plasmid pRS316. LMB858 and LMB858 were created by in-vivo integration of the GFP(S65T) cassette into the *MEP1* plasmid LMB856 or the *MEP3* plasmid LMB857, respectively. Plasmids were recovered and sequenced to confirm the integration.

### Plasmids used in this study

| Plasmid  | Description                                         | Source     |
|----------|-----------------------------------------------------|------------|
| LMB769   | <i>ERV14</i> in pRS315                              | This Study |
| LMB770   | <i>ERV14</i> in pRS316                              | This Study |
| LMB772   | <i>ERV14</i> -3HA:: <i>KanMX</i> in pRS315          | This Study |
| LMB773   | <i>ERV14</i> -sfGFP:: <i>KanMX</i> in pRS315        | This Study |
| LMB776   | <i>ERV14pr-ERV15</i> in pRS315                      | This Study |
| LMB718   | <i>ERV14</i> in pDSL-Nx                             | This Study |
| LMB856   | <i>MEP1</i> in pRS316                               | This Study |
| LMB857   | <i>MEP3</i> in pRS316                               | This Study |
| LMB858   | <i>MEP1</i> -sfGFP:: <i>TRP1</i> in pRS316          | This Study |
| LMB859   | <i>MEP3</i> -sfGFP:: <i>HIS5</i> in pRS316          | This Study |
| spQC1885 | (I97A, F98A, R99A, T100A, L101A) mutation in LMB772 | This Study |
| spQC2012 | (F62A, L63A, N74A) mutation in LMB772               | This Study |
| spQC2007 | (D33A, Y34A, P50A, E51A) mutation in LMB772         | This Study |

|                 |                                                                         |               |
|-----------------|-------------------------------------------------------------------------|---------------|
| spQC1888        | (I97A, F98A, R99A, T100A, L101A) mutation in LMB773                     | This Study    |
| spQC1908        | (F62A, L63A, N74A) mutation in LMB773                                   | This Study    |
| spQC1913        | (D33A, Y34A, P50A, E51A) mutation in LMB773                             | This Study    |
| spQC1891        | (D33A, Y34A) mutation in LMB773                                         | This Study    |
| spQC1892        | (C41A) mutation in LMB773                                               | This Study    |
| spQC1893        | (P50A, E51A) mutation in LMB773                                         | This Study    |
| spQC1894        | (F62A, L63A) mutation in LMB773                                         | This Study    |
| spQC1895        | (W68A) mutation in LMB773                                               | This Study    |
| spQC1896        | (N74A) mutation in LMB773                                               | This Study    |
| spQC1897        | (P76A) mutation in LMB773                                               | This Study    |
| spQC1898        | (Y80A) mutation in LMB773                                               | This Study    |
| spQC1899        | (E107A) mutation in LMB773                                              | This Study    |
| spQC1900        | (K111A) mutation in LMB773                                              | This Study    |
| spQC1901        | (F119A) mutation in LMB773                                              | This Study    |
| spQC1902        | (F120A) mutation in LMB773                                              | This Study    |
| spQC1903        | (Y124A) mutation in LMB773                                              | This Study    |
| spQC2182        | (I97A, F98A, R99A, T100A, L101A) mutation in LMB718                     | This Study    |
| spQC1982        | (D33A, Y34A, P50A, E51A) mutation in LMB718                             | This Study    |
| spQC2241        | (L63A) mutation in LMB718                                               | This Study    |
| spQC2242        | (F62A, L63A) mutation in LMB718                                         | This Study    |
| spQC2243        | (F62A) mutation in LMB718                                               | This Study    |
| pLM22           | 4.2kb XhoI-SpeI fragment containing 6xHis-tagged <i>SEC24</i> in pRS316 | [S8]          |
| pLM23           | 4.2kb XhoI-SpeI fragment containing 6xHis-tagged <i>SEC24</i> in pRS313 | [S8]          |
| pLM134          | SEC24-B1: (R230A, R235A) mutation in pLM23                              | [S8]          |
| pLM251          | SEC24-A: (W897A) mutation in pLM23                                      | [S8]          |
| pLM174          | SEC24-C: (R342A) mutation in pLM23                                      | [S8]          |
| pTKY9           | SEC23 in p426GAL1                                                       | [S10]         |
| pLM129          | SEC24 in p425GAL1                                                       | [S8]          |
| pLM125          | SEC24-B1: (R230A, R235A) mutation in pLM129                             | [S8]          |
| pLM253          | SEC24-A: (W897A) mutation in pLM129                                     | [S8]          |
| pLM208          | SEC24-C: (R342A) mutation in pLM129                                     | [S8]          |
| pJW1512         | <i>CUP1pr CEN LEU3</i>                                                  | Rothstein Lab |
| pJW1512-SEC24   | <i>CUP1pr-SEC24</i> in pJW1512                                          | [S8]          |
| pJW1512-sec24-B | SEC24-B1: (R230A, R235A) mutation in pJW1512-SEC24                      | This study    |
| pJW1512-sec24-A | SEC24-A: (W897A) mutation in pJW1512-SEC24                              | This study    |
| pJW1512-sec24-C | SEC24-C: (R342A) mutation in pJW1512-SEC24                              | This study    |
| spQC2553        | (S491D, F576A, R578A) mutation in pLM129                                | This study    |
| spQC2554        | (S491E, F576A, R578A) mutation in pLM129                                | This study    |
| spQC2555        | (S491A, F576A, R578A) mutation in pLM129                                | This study    |
| spQC2508        | (S491A) mutation in pLM23                                               | This study    |
| spQC2509        | (S491D) mutation in pLM23                                               | This study    |
| spQC2510        | (S491E) mutation in pLM23                                               | This study    |
| spQC2512        | (F576A, R578A) mutation in pLM23                                        | This study    |
| spQC2518        | (S491A) mutation in pLM134                                              | This study    |
| spQC2519        | (S491D) mutation in pLM134                                              | This study    |
| spQC2520        | (S491E) mutation in pLM134                                              | This study    |
| spQC2522        | (F576A, R578A) mutation in pLM134                                       | This study    |
| pEAE83          | YOR1-HA in pRS316                                                       | [S11]         |
| pLM308          | D71E73A (Yor1D71A,E73A) mutation in pEAE83                              | [S10]         |
| pEAE93          | YOR1-GFP in pRS316                                                      | [S11]         |

- [S1]** Giaever, G., Chu, A. M., Ni, L., Connelly, C., Riles, L., Veronneau, S., Dow, S., Lucau-Danila, A., Anderson, K., Andre, B., Arkin, A., P., Astromoff, A., El-bakkoury, M., Bangham, R., Benito, R., Brachat, S., Campanaro, S., Curtiss, M., Davis, K., Deutschbauer, A., Entian, K. D., Flaherty, P., Foury, F., Garfinkel, D. J., Gerstein, M., Gotte, D., Guldener, U., Hegemann, J. H., Hempel, S., Herman, Z., Jaramillo, D. F., Kelly, D. E., Kelly, S. L., Kotter, P., Labonte, D., Lamb, D. C., Lan, N., Liang, H., Liao, H., Liu, L., Luo, C., Lussier, M., Mao, R., Menard, P., Ooi, S. L., Revuelta, J. L., Roberts, C. J., Rose, M., Ross-macdonald, P., Scherens, B., Schimmack, G., Shafer, B., Shoemaker, D. D., Sookhai-mahadeo, S., Storms, R. K., Strathern, J. N., Valle, G., Voet, M., Volckaert, G., Wang, C. Y., Ward, T. R., Wilhelmy, J., Winzeler, E. A., Yang, Y., Yen, G., Youngman, E., Yu, K., Bussey, H., Boeke, J. D., Snyder, M., Philippsen, P., Davis, R. W. & Johnston, M. (2002). Functional profiling of the *Saccharomyces cerevisiae* genome. *Nature*, 418, 387-91.
- [S2]** Huh, W.K., Falvo, J.V., Gerke, L.C., Carroll, A.S., Howson, R.W., Weissman, J.S., and O'Shea, E.K. (2003). Global analysis of protein localization in budding yeast. *Nature* 425, 686-691.
- [S3]** Longtine, M. S., Mckenzie, A., 3rd, Demarini, D. J., Shah, N. G., Wach, A., Brachat, A., Philippsen, P. & Pringle, J. R. (1998). Additional modules for versatile and economical PCR-based gene deletion and modification in *Saccharomyces cerevisiae*. *Yeast*, 14, 953-61.
- [S4]** Herzig, Y., Sharpe, H.J., Elbaz, Y., Munro, S., and Schuldiner, M. (2012). A systematic approach to pair secretory cargo receptors with their cargo suggests a mechanism for cargo selection by Erv14. *PLoS Biol* 10, e1001329.
- [S5]** Snider, J., Hanif, A., Lee, M. E., Jin, K., Yu, A. R., Graham, C., Chuk, M., Damjanovic, D., Wierzbicka, M., tang, P., balderes, D., wong, V., jessulat, M., Darowski, K. D., San luis, B. J., Shevelev, I., Sturley, S. L., Boone, C., Greenblatt, J. F., Zhang, Z., Paumi, C. M., Babu, M., Park, H. O., Michaelis, S. & Stagljar, I. (2013). Mapping the functional yeast ABC transporter interactome. *Nat Chem Biol*, 9, 565-72.
- [S6]** Breslow, D. K., Cameron, D. M., Collins, S. R., Schuldiner, M., Stewart-ornstein, J., Newman, H. W., Braun, S., Madhani, H. D., Krogan, N. J. & Weissman, J. S. (2008). A comprehensive strategy enabling high-resolution functional analysis of the yeast genome. *Nature Methods*, 5, 711-718.
- [S7]** Snider, J., Kittanakom, S., Damjanovic, D., Curak, J., Wong, V., and Stagljar, I. (2010). Detecting interactions with membrane proteins using a membrane two-hybrid assay in yeast. *Nature protocols* 5, 1281-1293.
- [S8]** Miller, E.A., Beilharz, T.H., Malkus, P.N., Lee, M.C., Hamamoto, S., Orci, L., and Schekman, R. (2003). Multiple cargo binding sites on the COPII subunit Sec24p ensure capture of diverse membrane proteins into transport vesicles. *Cell* 114, 497-509.
- [S9]** Kung, L.F., Pagant, S., Futai, E., D'Arcangelo, J.G., Buchanan, R., Dittmar, J.C., Reid, R.J., Rothstein, R., Hamamoto, S., Snapp, E.L., et al. (2012). Sec24p and Sec16p cooperate to regulate the GTP cycle of the COPII coat. *EMBO J* 31, 1014-1027.
- [S10]** Kurihara, T., Hamamoto, S., Gimeno, R. E., Kaiser, C. A., Schekman, R. & Yoshihisa, T. (2000). Sec24p and Iss1p function interchangeably in transport vesicle formation from the endoplasmic reticulum in *Saccharomyces cerevisiae*. *Mol Biol Cell*, 11, 983-98.

**[S11]** Katzmann, D. J., Epping, E. A. & Moye-Rowley, W. S. (1999). Mutational disruption of plasma membrane trafficking of *Saccharomyces cerevisiae* Yor1p, a homologue of mammalian multidrug resistance protein. *Mol Cell Biol*, *19*, 2998-3009.

**[S12]** Pagant, S., Kung, L., Dorrington, M., Lee, M.C., and Miller, E.A. (2007). Inhibiting endoplasmic reticulum (ER)-associated degradation of misfolded Yor1p does not permit ER export despite the presence of a diacidic sorting signal. *Mol Biol Cell* *18*, 3398-3413.
